# Supplementary material for: Deletion of Y chromosome before allogeneic hematopoietic stem cell transplantation in male recipients with female donors
Source: PubMed Central journal article supplement — Blood Adv. 2022 Mar 17;6(6):1895–903. doi: 10.1182/bloodadvances.2021006456 (PMC8941451; doi:10.1182/bloodadvances.2021006456), 2022-03-17

Supplementary information for

**Deletion of Y-chromosome before allogeneic hematopoietic stem cell transplantation in male recipients with female donors.**

Masaharu Tamaki<sup>1, 17#</sup>, Kazuaki Kameda<sup>1,17</sup>, Shun-ichi Kimura<sup>1,17</sup>, Naonori Harada<sup>2,17</sup>, Naoyuki Uchida<sup>3</sup>, Noriko Doki<sup>4</sup>, Masatsugu Tanaka<sup>5</sup>, Kazuhiro Ikegame<sup>6</sup>, Masashi Sawa<sup>7</sup>, Yuta Katayama<sup>8</sup>, Shigesaburo Miyakoshi<sup>9</sup>, Takahide Ara<sup>10</sup>, Junya Kanda<sup>11</sup>, Makoto Onizuka<sup>12</sup>, Takahiro Fukuda<sup>13</sup>, Yoshiko Atsuta<sup>14,15</sup>, Yoshinobu Kanda<sup>1</sup>, Kimikazu Yakushijin<sup>16,17</sup>, Hideki Nakasone<sup>1,17#</sup> .

1. Division of Hematology, Jichi Medical University Saitama Medical Center, Saitama, Japan
2. Department of Hematology, Graduate School of Medicine, Osaka City University, Osaka, Japan
3. Department of Hematology, Federation of National Public Service Personnel Mutual Aid Associations Toranomon Hospital, Tokyo, Japan
4. Hematology Division, Tokyo Metropolitan Cancer and Infectious Disease Center, Komagome Hospital, Tokyo, Japan
5. Department of Hematology, Kanagawa Cancer Center, Yokohama, Japan
6. Department of Hematology, Hyogo College of Medicine Hospital, Nishinomiya, Japan
7. Department of Hematology and Oncology, Anjo Kosei Hospital, Anjo, Japan
8. Department of Hematology, Hiroshima Red Cross Hospital & Atomic-bomb Survivors Hospital, Hiroshima, Japan
9. Department of Hematology, Tokyo Metropolitan Geriatric Hospital, Tokyo, Japan
10. Department of Hematology, Hokkaido University Hospital, Sapporo, Japan
11. Department of Hematology and Oncology, Graduate School of Medicine, Kyoto University, Kyoto, Japan
12. Department of Hematology / Oncology, Tokai University School of Medicine, Isehara, Japan
13. Hematopoietic Stem Cell Transplantation Division, National Cancer Hospital, Tokyo, Japan
14. Japanese Data Center for Hematopoietic Cell Transplantation, Nagoya, Japan
15. Department of Registry Science for Transplant and Cellular Therapy, Aichi Medical University School of Medicine, Nagakute, Japan
16. Department of Medical Oncology and Hematology, Kobe University Hospital, Kobe, Japan
17. Transplant Complications Working Group of Japanese Society for Transplantation and Cellular therapy (JSTCT)

# Co-corresponding authors:

Masaharu Tamaki, M.D. E-mail: [mtamaki@jichi.ac.jp](mailto:mtamaki@jichi.ac.jp)

Hideki Nakasone, M.D., Ph.D. E-mail: [nakasone-tyk@umin.ac.jp](mailto:nakasone-tyk@umin.ac.jp)

Division of Hematology, Jichi Medical University Saitama Medical University Saitama Medical Center, 1-847 Amanuma-cho, Omiya-ku, Saitama city, Saitama 330-8503

E-mail: [mtamaki@jichi.ac.jp](mailto:mtamaki@jichi.ac.jp)

TEL: +81-48-647-2111 FAX: +81-48-644-5166

## Supplemental Tables

Supplemental Table 1. Multivariate analysis of acute GVHD and chronic GVHD in female-to-male transplant recipients.

|                            |                    | Grade II - IV acute GVHD |       | Chronic GVHD          |         |
|----------------------------|--------------------|--------------------------|-------|-----------------------|---------|
|                            |                    | HR (95% CI)              | P     | HR (95% CI)           | P value |
| Del (Y)                    |                    | 1.18 (0.890 – 1.56)      | 0.25  | 0.819 (0.576 – 1.16)  | 0.27    |
| Age > 50 years             |                    | 0.978 (0.867 – 1.10)     | 0.72  | 1.13 (1.00 – 1.28)    | 0.046   |
| Disease                    | AML                | Reference                | 1.0   | Reference             | 1.0     |
|                            | ALL                | 1.09 (0.945 – 1.26)      | 0.23  | 0.856 (0.739 – 0.993) | 0.040   |
|                            | MDS                | 1.11 (0.965 – 1.28)      | 0.14  | 1.09 (0.939 – 1.26)   | 0.26    |
|                            | MPN                | 0.908 (0.663 – 1.24)     | 0.55  | 1.02 (0.750 – 1.37)   | 0.92    |
| DRI                        | Low                | Reference                | 1.0   | Reference             | 1.0     |
|                            | Intermediate       | 0.965 (0.729 – 1.28)     | 0.80  | 0.954 (0.732 – 1.24)  | 0.73    |
|                            | High               | 1.06 (0.800 – 1.41)      | 0.67  | 0.931 (0.707 – 1.23)  | 0.61    |
|                            | Very high          | 0.924 (0.657 – 1.30)     | 0.65  | 0.680 (0.458 – 1.01)  | 0.056   |
| HCT-CI $\geq$ 2            |                    | 1.11 (0.988 – 1.25)      | 0.078 | 1.07 (0.945 – 1.22)   | 0.28    |
| PS 2 – 4                   |                    | 0.985 (0.802 – 1.21)     | 0.89  | 0.895 (0.685 – 1.17)  | 0.42    |
| Donor type                 | Matched related    | Reference                | 1.0   | Reference             | 1.0     |
|                            | Matched unrelated  | 1.22 (0.983 – 1.52)      | 0.072 | 1.08 (0.879 – 1.32)   | 0.47    |
|                            | Mismatched related | 1.11 (0.888 – 1.39)      | 0.36  | 0.795 (0.631 – 1.00)  | 0.051   |
|                            | Mismatched         | 1.36 (1.07 – 1.73)       | 0.012 | 1.04 (0.826 – 1.31)   | 0.74    |
| Donor source               | Bone marrow        | Reference                | 1.0   | Reference             | 1.0     |
|                            | Peripheral blood   | 1.18 (0.985 – 1.42)      | 0.072 | 1.09 (0.923 – 1.29)   | 0.31    |
|                            | Cord blood         | 0.963 (0.808 – 1.15)     | 0.67  | 0.546 (0.452 – 0.659) | <0.001  |
| Myeloablative conditioning |                    | 1.17 (1.03 – 1.33)       | 0.016 | 1.46 (1.27 – 1.68)    | <0.001  |
| GVHD prophylaxis           | CsA-based          | Reference                | 1.0   | Reference             | 1.0     |
|                            | TAC-based          | 0.856 (0.747 – 0.981)    | 0.025 | 0.906 (0.787 – 1.04)  | 0.17    |
|                            | Others             | 0.814 (0.522 – 1.27)     | 0.36  | 0.970 (0.623 – 1.51)  | 0.89    |
| in vivo T cell depletion   |                    | 0.961 (0.795 – 1.16)     | 0.68  | 0.794 (0.643 – 0.892) | 0.033   |

Abbreviations: Del(Y), deletion of Y-chromosome; GVHD, graft-versus-host disease; HR, hazard ratio; CI, confidence interval; AML, acute myeloid leukemia; ALL, acute lymphoid leukemia; MDS, myelodysplastic syndrome; MPN, myeloproliferative neoplasm; DRI, disease risk index; HCT-CI, hematopoietic cell transplantation comorbidity index; PS, performance status; CsA, cyclosporine; TAC, tacrolimus

Supplemental Table 2. Main cause of death.

|               | Del(Y) (n = 155) | Y-present (n = 4149) | P value |
|---------------|------------------|----------------------|---------|
| Progression   | 51 (32.9)        | 790 (19.0)           | <0.001  |
| Infection     | 13 (8.4)         | 414 (10.0)           | 0.59    |
| Acute GVHD    | 2 (1.3)          | 87 (2.1)             | 0.77    |
| TMA           | 4 (2.6)          | 57 (1.4)             | 0.28    |
| SOS           | 2 (1.3)          | 52 (1.3)             | 0.72    |
| Graft failure | 0 (0.0)          | 50 (1.2)             | 0.26    |

Abbreviations: Del(Y), deletion of Y-chromosome; Y-present, presence of Y-chromosome; GVHD, graft-versus-host disease; TMA, thrombotic microangiopathy; SOS, sinusoidal obstruction syndrome.

Supplemental Table 3. Patient characteristics in a matched-pair analysis.

|                                 |                      | Female-to-male allo-HCT |                        | Male-to-male allo-HCT |                        |
|---------------------------------|----------------------|-------------------------|------------------------|-----------------------|------------------------|
|                                 |                      | Del(Y)<br>(n = 117)     | Y-present<br>(n = 117) | Del(Y)<br>(n = 194)   | Y-present<br>(n = 194) |
| Age, n (%)                      | ≤ 50 years           | 40 (34.1)               | 40 (34.1)              | 76 (39.2)             | 76 (39.2)              |
|                                 | > 50 years           | 77 (67.5)               | 77 (67.5)              | 118 (60.8)            | 118 (60.8)             |
| Disease type, n (%)             | AML                  | 83 (70.9)               | 83 (70.9)              | 124 (63.9)            | 124 (63.9)             |
|                                 | ALL                  | 13 (11.1)               | 13 (11.1)              | 22 (11.3)             | 22 (11.3)              |
|                                 | MDS                  | 21 (17.9)               | 21 (17.9)              | 46 (23.7)             | 46 (23.7)              |
|                                 | MPN                  | 0 (0.0)                 | 0 (0.0)                | 0 (0.0)               | 0 (0.0)                |
| DRI, n (%)                      | Low                  | 15 (12.8)               | 15 (12.8)              | 21 (10.8)             | 21 (10.8)              |
|                                 | Intermediate         | 39 (33.3)               | 39 (33.3)              | 91 (46.9)             | 91 (46.9)              |
|                                 | High                 | 37 (31.6)               | 37 (31.6)              | 52 (26.8)             | 52 (26.8)              |
|                                 | Very high            | 26 (22.2)               | 26 (22.2)              | 30 (15.5)             | 30 (15.5)              |
| HCT-CI, n (%)                   | 0 – 1                | 69 (59.0)               | 69 (59.0)              | 119 (61.3)            | 119 (61.3)             |
|                                 | ≥ 2                  | 48 (41.0)               | 48 (41.0)              | 75 (38.7)             | 75 (38.7)              |
| PS, n (%)                       | 0 – 1                | 108 (92.3)              | 108 (92.3)             | 180 (92.8)            | 180 (92.8)             |
|                                 | 2 – 4                | 9 (7.7)                 | 9 (7.7)                | 14 (7.2)              | 14 (7.2)               |
| Donor type, n (%)               | Matched related      | 25 (21.4)               | 25 (21.4)              | 32 (16.5)             | 32 (16.5)              |
|                                 | Matched unrelated    | 19 (16.2)               | 19 (16.2)              | 57 (29.4)             | 57 (29.4)              |
|                                 | Mismatched related   | 8 (6.8)                 | 8 (6.8)                | 17 (8.8)              | 17 (8.8)               |
|                                 | Mismatched unrelated | 65 (55.6)               | 65 (55.6)              | 88 (45.4)             | 88 (45.4)              |
| Donor source, n (%)             | Bone marrow          | 31 (26.5)               | 31 (26.5)              | 82 (42.3)             | 82 (42.3)              |
|                                 | Peripheral blood     | 29 (24.8)               | 29 (24.8)              | 50 (25.8)             | 50 (25.8)              |
|                                 | Cord blood           | 57 (48.7)               | 57 (48.7)              | 62 (32.0)             | 62 (32.0)              |
| Conditioning regimen, n (%)     | MAC                  | 78 (66.7)               | 78 (66.7)              | 145 (74.7)            | 145 (74.7)             |
|                                 | RIC                  | 39 (33.3)               | 39 (33.3)              | 49 (25.3)             | 49 (25.3)              |
| GVHD prophylaxis, n (%)         | CsA-based            | 26 (22.2)               | 26 (22.2)              | 48 (24.7)             | 48 (24.7)              |
|                                 | TAC-based            | 89 (76.1)               | 89 (76.1)              | 144 (74.2)            | 144 (74.2)             |
|                                 | Other                | 2 (1.7)                 | 2 (1.7)                | 2 (1.0)               | 2 (1.0)                |
| in vivo T-cell depletion, n (%) | +                    | 112 (95.7)              | 112 (95.7)             | 182 (93.8)            | 182 (93.8)             |
|                                 | -                    | 5 (4.3)                 | 5 (4.3)                | 12 (6.2)              | 12 (6.2)               |

Abbreviations: Del(Y), deletion of Y chromosome; Y-present, presence of Y-chromosome; AML, acute myeloid leukemia; ALL, acute lymphoid leukemia; MDS, myelodysplastic syndrome; MPN, myeloproliferative neoplasm; DRI, disease risk index; HCT-CI, hematopoietic cell transplantation comorbidity index; PS, performance status; MAC, myeloablative conditioning; RIC, reduced intensity conditioning; GVHD, graft-versus-host disease; CsA, cyclosporine; TAC, tacrolimus.

Supplemental Figure 1. Impact of deletion of Y-chromosome (Del(Y)) on clinical outcomes allogeneic hematopoietic cell transplantation from female donors to male recipients (female-to-male allo-HCT) in the sub cohorts stratified according to HLA disparity.

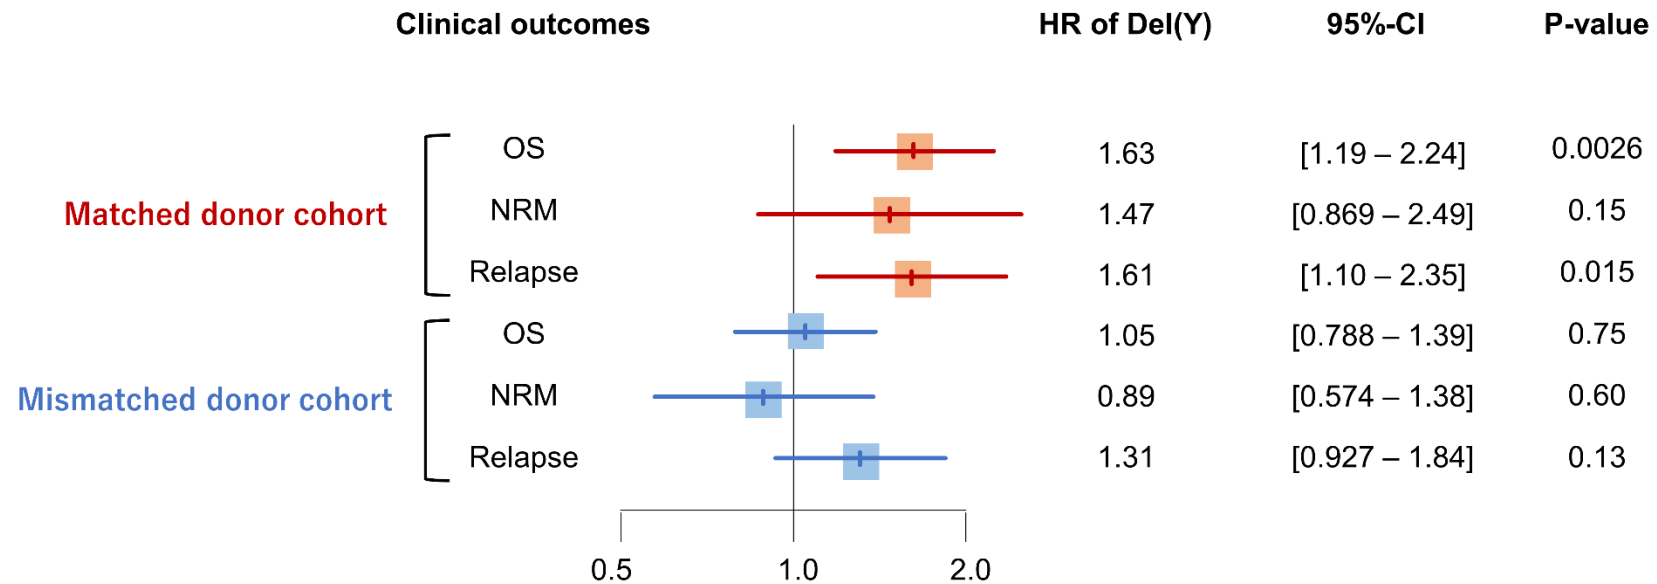

Supplemental Figure 2. Impact of female-to-male allo-HCT in the sub cohorts stratified according to the presence of Y-chromosome.

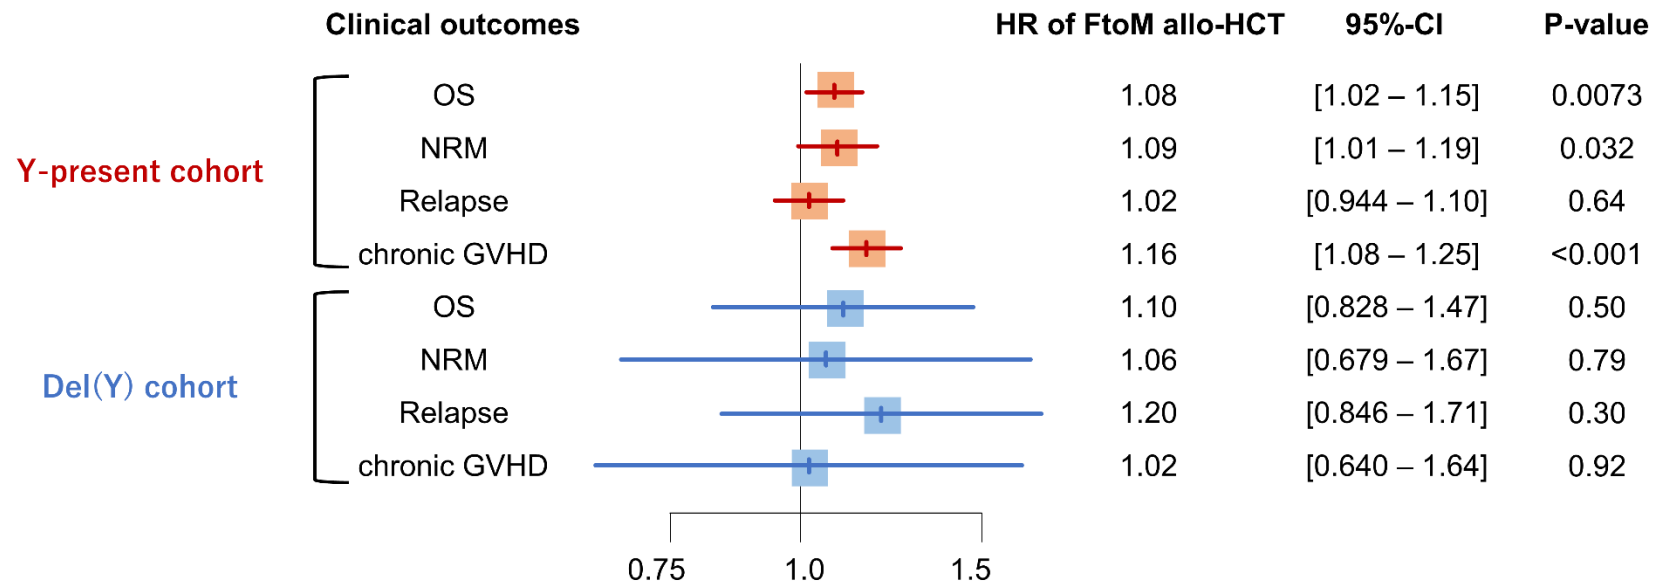

Supplement: advancesADV2021006456-suppl1.pdf [file advancesADV2021006456-suppl1.pdf]
